# Supplementary material for: Chemically exfoliated nanosilicate platelet hybridized polymer electrolytes for solid state dye sensitized solar cells
Source: Royal Society of Chemistry journal article supplement (doi:10.1039/c5nj00795j), 2015-01-01
Supplement: c5nj00795j1.pdf [file c5nj00795j1.pdf]

## **Supplementary Information**

### **Chemically Exfoliated Nanosilicate Platelets Hybridized Polymer Electrolytes for Solid State Dye Sensitized Solar Cells**

Karuppanan Prabakaran, Smita Mohanty\* and Sanjay Kumar Nayak

Laboratory for Advanced Research in Polymeric Materials (LARPM),

Central Institute of Plastics Engineering & Technology (CIPET),

Bhubaneswar, Odisha, India-751 024.

\*Email: [papers.journal@gmail.com](mailto:papers.journal@gmail.com)

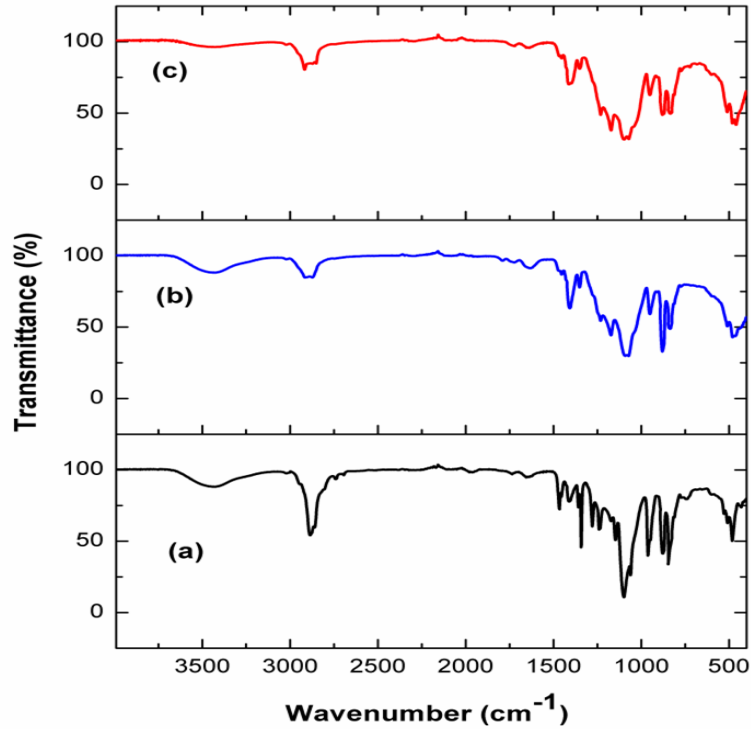

**Fig. s1<sup>†</sup>** FTIR spectra of (a) PEO/PVdF-HFP, (b) PEO/PVdF-HFP/MMT and (c) PEO/PVdF-HFP/e-MMT composite membranes

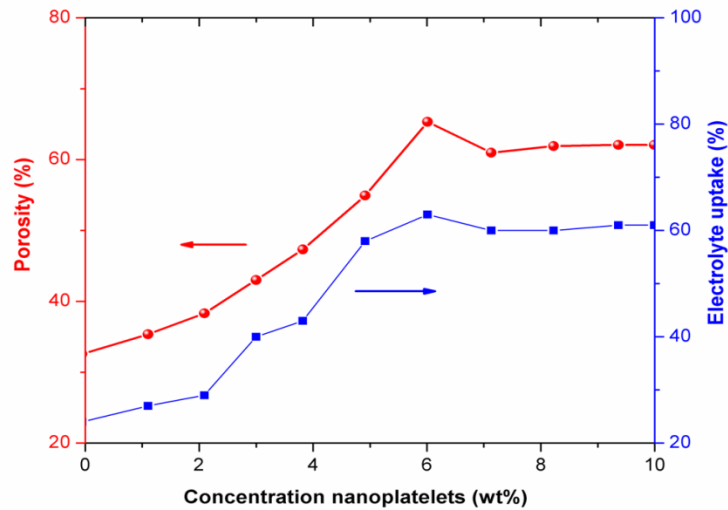

**Fig. s2<sup>†</sup>** Porosity and electrolyte uptake of PEO/PVdF-HFP as a function of exfoliate MMT nanoplatelets (e-MMT)

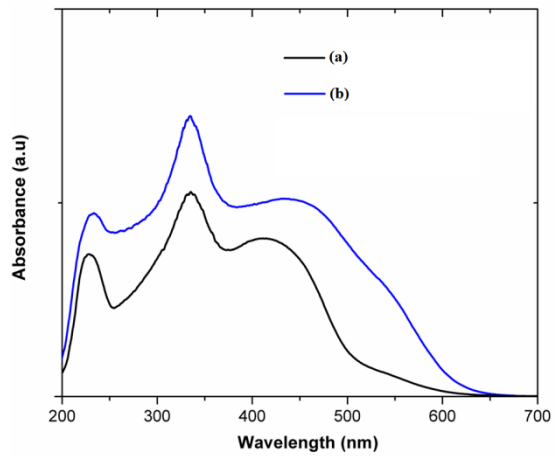

**Fig. s3<sup>†</sup>** UV-Vis absorption spectra of PEO/PVDF-HFP composite electrolyte membranes (a) with pristine MMT and (b) exfoliated MMT

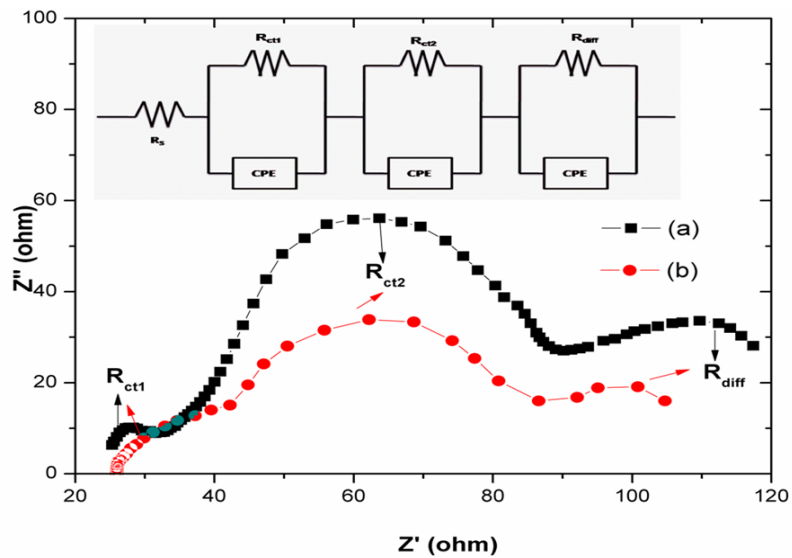

**Fig.s4<sup>†</sup>** The EIS of the DSSCs based on PEO/PVDF-HFP electrolytes with (a) NaMMT and (b) PEO/PVdF-HFP/e-MMT under the illuminations of  $100 \text{ mW cm}^{-2}$

**Table s1<sup>†</sup> Thermal parameters derived from DSC**

| Polymer composite                     | Crystallinity (%) (PEO) | $T_g$ °C | $\Delta H_{m1}$ J/g | $\Delta H_{m2}$ J/g |
|---------------------------------------|-------------------------|----------|---------------------|---------------------|
| PEO/PVDF-HFP                          | 21.10                   | -22.5    | 45.91               | 27.12               |
| PEO/PVDF-HFP/pristine MMT (NaMMT)     | 16.5                    | -23.4    | 35.26               | 24.33               |
| PEO/PVDF-HFP/exfoliated MMT platelets | 15.6                    | -25.7    | 33.48               | 23.72               |

**Table s2<sup>†</sup> EIS parameter of DSSC 100 mW/cm<sup>2</sup> illumination**

| Electrolyte        | With NaMMT nanoplatelets (un modified) | With eMMT nanoplatelets (Exfoliated/ Modified) |
|--------------------|----------------------------------------|------------------------------------------------|
| $R_{ct1}/ \Omega$  | 12.4                                   | 14.2                                           |
| $R_{ct2}/ \Omega$  | 42.0                                   | 40.8                                           |
| $R_{diff}/ \Omega$ | 30.7                                   | 20.0                                           |
